# Supplementary material for: Effect of ceritinib on the pharmacokinetics of coadministered CYP3A and 2C9 substrates: a phase I, multicenter, drug–drug interaction study in patients with ALK + advanced tumors
Source: PubMed Central journal article supplement (PMC7946667; doi:10.1007/s00280-020-04180-3), 2021-01-04
Supplement: 280_2020_4180_MOESM1_ESM.pdf [file 280_2020_4180_MOESM1_ESM.pdf]

**Table S1.** Patient disposition

| Disposition/Reason                                      | All Patients<br>N=33<br>n (%) |
|---------------------------------------------------------|-------------------------------|
| <b>DDI phase (pharmacokinetic evaluation)</b>           |                               |
| Completed                                               | 18 (54.5)                     |
| Discontinued from DDI phase                             | 15 (45.5)                     |
| Permanently discontinued the study                      | 12 (36.4)                     |
| Primary reason for discontinuation from DDI phase       |                               |
| Adverse event                                           | 8 (24.2)                      |
| Progressive disease                                     | 6 (18.2)                      |
| Death                                                   | 1 (3.0)                       |
| <b>Treatment phase (DDI phase + post-DDI phase)</b>     |                               |
| Discontinued from treatment phase                       | 33 (100)                      |
| Primary reason for discontinuation from treatment phase |                               |
| Adverse event                                           | 6 (18.2)                      |
| Study terminated by sponsor                             | 12 (36.4)                     |
| Progressive disease                                     | 13 (39.4)                     |
| Subject/guardian decision                               | 1 (3.0)                       |
| Death                                                   | 1 (3.0)                       |
