# Supplementary material for: Effect of ceritinib on the pharmacokinetics of coadministered CYP3A and 2C9 substrates: a phase I, multicenter, drug–drug interaction study in patients with ALK + advanced tumors
Source: PubMed Central journal article supplement (PMC7946667; doi:10.1007/s00280-020-04180-3), 2021-01-04
Supplement: 280_2020_4180_MOESM2_ESM.pdf [file 280_2020_4180_MOESM2_ESM.pdf]

**Table S2.** Summary of statistical analysis of primary pharmacokinetic parameters of midazolam and warfarin and their major metabolites, before and after co-administration of ceritinib at 750 mg orally QD for 3 weeks

| Pharmacokinetic parameter (unit)      | n  | Adjusted geometric mean | Treatment comparison: Geometric mean ratio (90% CI) <sup>1</sup> |
|---------------------------------------|----|-------------------------|------------------------------------------------------------------|
| <b>CYP3A</b>                          |    |                         |                                                                  |
| <b>Midazolam</b>                      |    |                         |                                                                  |
| <b>AUC<sub>0-inf</sub> (ng*hr/mL)</b> |    |                         |                                                                  |
| midazolam                             | 20 | 72.5                    | 5.42                                                             |
| midazolam + ceritinib                 | 20 | 393                     | (4.64, 6.34)                                                     |
| <b>C<sub>max</sub> (ng/mL)</b>        |    |                         |                                                                  |
| midazolam                             | 20 | 23.0                    | 1.82                                                             |
| midazolam + ceritinib                 | 20 | 42.0                    | (1.54, 2.16)                                                     |
| <b>1'-hydroxymidazolam</b>            |    |                         |                                                                  |
| <b>AUC<sub>0-inf</sub> (ng*hr/mL)</b> |    |                         |                                                                  |
| midazolam                             | 19 | 16.2                    | 0.947                                                            |
| midazolam + ceritinib                 | 13 | 15.4                    | (0.729, 1.23)                                                    |
| <b>C<sub>max</sub> (ng/mL)</b>        |    |                         |                                                                  |
| midazolam                             | 19 | 5.43                    | 0.351                                                            |
| midazolam + ceritinib                 | 19 | 1.90                    | (0.260, 0.472)                                                   |
| <b>CYP2C9</b>                         |    |                         |                                                                  |
| <b>S-warfarin</b>                     |    |                         |                                                                  |
| <b>AUC<sub>0-inf</sub> (ng*hr/mL)</b> |    |                         |                                                                  |
| warfarin                              | 18 | 21200                   | 1.54                                                             |
| warfarin + ceritinib                  | 10 | 32800                   | (1.36, 1.75)                                                     |
| <b>C<sub>max</sub> (ng/mL)</b>        |    |                         |                                                                  |
| warfarin                              | 20 | 569                     | 1.05                                                             |
| warfarin + ceritinib                  | 19 | 598                     | (0.912, 1.21)                                                    |
| <b>R-warfarin</b>                     |    |                         |                                                                  |
| <b>AUC<sub>0-inf</sub> (ng*hr/mL)</b> |    |                         |                                                                  |
| warfarin                              | 10 | 36300                   | 1.07                                                             |
| warfarin + ceritinib                  | 4  | 38900                   | (0.857, 1.33)                                                    |
| <b>C<sub>max</sub> (ng/mL)</b>        |    |                         |                                                                  |
| warfarin                              | 20 | 560                     | 1.10                                                             |
| warfarin + ceritinib                  | 20 | 616                     | (0.969, 1.25)                                                    |
| <b>7-hydroxy-S-warfarin</b>           |    |                         |                                                                  |
| <b>AUC<sub>0-inf</sub> (ng*hr/mL)</b> |    |                         |                                                                  |
| warfarin                              | 12 | 3090                    | 1.08                                                             |
| warfarin + ceritinib                  | 5  | 3330                    | (0.814, 1.43)                                                    |
| <b>C<sub>max</sub> (ng/mL)</b>        |    |                         |                                                                  |
| warfarin                              | 16 | 39.1                    | 0.890                                                            |
| warfarin + ceritinib                  | 13 | 34.8                    | (0.777, 1.02)                                                    |

Model was a linear mixed effects model of the log-transformed  $AUC_{0-inf}$  and  $C_{max}$ , and included treatment as a fixed effect and patient as a random effect.

Adjusted geometric mean, geometric mean ratio, and 90% confidence interval (90% CI) of  $AUC_{0-inf}$  and  $C_{max}$  were all determined from the model and values were back-transformed from log-scale.

$AUC_{0-inf}$ : area under the plasma concentration-time curve  $t=0-\infty$ ;  $C_{max}$ : maximum plasma concentration observed;  $n$ : number of observations included in the analysis.

<sup>1</sup> Probe substrate + ceritinib / probe substrate alone.
