# Supplementary material for: Effect of ceritinib on the pharmacokinetics of coadministered CYP3A and 2C9 substrates: a phase I, multicenter, drug–drug interaction study in patients with ALK + advanced tumors
Source: PubMed Central journal article supplement (PMC7946667; doi:10.1007/s00280-020-04180-3), 2021-01-04
Supplement: 280_2020_4180_MOESM3_ESM.pdf [file 280_2020_4180_MOESM3_ESM.pdf]

**Table S3.** All-causality adverse events in  $\geq 10\%$  of patients

| Preferred Term                 | All Patients<br>N=33 |                    |
|--------------------------------|----------------------|--------------------|
|                                | All Grades<br>n (%)  | Grade 3/4<br>n (%) |
| Total                          | 32 (97.0)            | 25 (75.8)          |
| Diarrhoea                      | 25 (75.8)            | 1 (3.0)            |
| Nausea                         | 20 (60.6)            | 2 (6.1)            |
| Vomiting                       | 17 (51.5)            | 3 (9.1)            |
| Increased ALT                  | 12 (36.4)            | 9 (27.3)           |
| Increased GGT                  | 11 (33.3)            | 6 (18.2)           |
| Increased AST                  | 10 (30.3)            | 4 (12.1)           |
| Asthenia                       | 10 (30.3)            | 2 (6.1)            |
| Increased ALP                  | 10 (30.3)            | 2 (6.1)            |
| Anaemia                        | 8 (24.2)             | 2 (6.1)            |
| Decreased appetite             | 8 (24.2)             | 1 (3.0)            |
| Abdominal pain                 | 7 (21.2)             | 1 (3.0)            |
| Blood creatinine increased     | 7 (21.2)             | 1 (3.0)            |
| Constipation                   | 7 (21.2)             | 0                  |
| Cough                          | 7 (21.2)             | 0                  |
| Dyspepsia                      | 7 (21.2)             | 0                  |
| Fatigue                        | 7 (21.2)             | 2 (6.1)            |
| Hypokalaemia                   | 7 (21.2)             | 3 (9.1)            |
| Weight decreased               | 7 (21.2)             | 0                  |
| Abdominal pain upper           | 6 (18.2)             | 0                  |
| Dyspnoea                       | 6 (18.2)             | 2 (6.1)            |
| Headache                       | 6 (18.2)             | 0                  |
| Non-cardiac chest pain         | 6 (18.2)             | 0                  |
| Rash                           | 6 (18.2)             | 0                  |
| Electrocardiogram QT prolonged | 5 (15.2)             | 0                  |
| Dizziness                      | 4 (12.1)             | 0                  |
| Hypertension                   | 4 (12.1)             | 0                  |
| Lipase increased               | 4 (12.1)             | 3 (9.1)            |
| Pyrexia                        | 4 (12.1)             | 0                  |

ALP: alkaline phosphatase; ALT: alanine aminotransferase; AST: aspartate aminotransferase; GGT: gamma-glutamyl transferase.
