# Supplementary material for: Effect of ceritinib on the pharmacokinetics of coadministered CYP3A and 2C9 substrates: a phase I, multicenter, drug–drug interaction study in patients with ALK + advanced tumors
Source: PubMed Central journal article supplement (PMC7946667; doi:10.1007/s00280-020-04180-3), 2021-01-04
Supplement: 280_2020_4180_MOESM4_ESM.pdf [file 280_2020_4180_MOESM4_ESM.pdf]

**Table S4.** Best overall response per investigator assessment (per RECIST 1.1)

| <b>Best Overall Response</b>                             | <b>NSCLC<br/>N=19</b>  | <b>Other<br/>N=14</b> | <b>All Patients<br/>N=33</b> |
|----------------------------------------------------------|------------------------|-----------------------|------------------------------|
| Complete response (CR), n (%)                            | 1 (5.3)                | 0                     | 1 (3.0)                      |
| Partial response (PR), n (%)                             | 7 (36.8)               | 1 (7.1)               | 8 (24.2)                     |
| Stable disease (SD), n (%)                               | 2 (10.5)               | 2 (14.3)              | 4 (12.1)                     |
| Progressive disease (PD), n (%)                          | 3 (15.8)               | 9 (64.3)              | 12 (36.4)                    |
| Non-CR/Non-PD, n (%)                                     | 2 (10.5)               | 0                     | 2 (6.1)                      |
| Unknown, n (%)                                           | 4 (21.1)               | 2 (14.3)              | 6 (18.2)                     |
| Overall response rate (ORR: CR + PR), n (%) [95% CI]     | 8 (42.1) [20.3, 66.5]  | 1 (7.1) [0.2, 33.9]   | 9 (27.3) [13.3, 45.5]        |
| Disease control rate (DCR: CR + PR + SD + non-CR/non-PD) | 12 (63.2) [38.4, 83.7] | 3 (21.4) [4.7, 50.8]  | 15 (45.5) [28.1, 63.6]       |
