# Supplementary material for: Effect of ceritinib on the pharmacokinetics of coadministered CYP3A and 2C9 substrates: a phase I, multicenter, drug–drug interaction study in patients with ALK + advanced tumors
Source: PubMed Central journal article supplement (PMC7946667; doi:10.1007/s00280-020-04180-3), 2021-01-04

**A**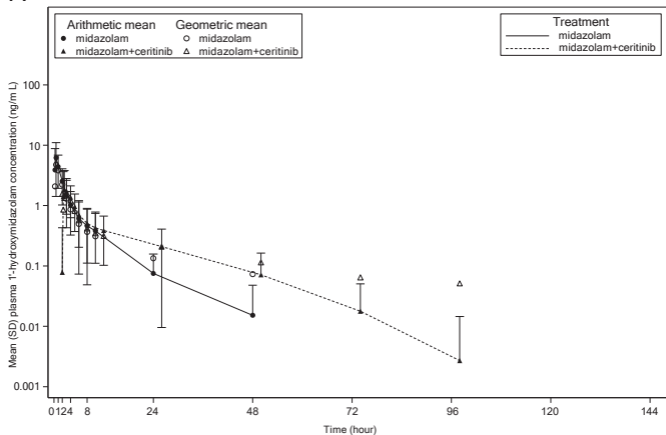**B**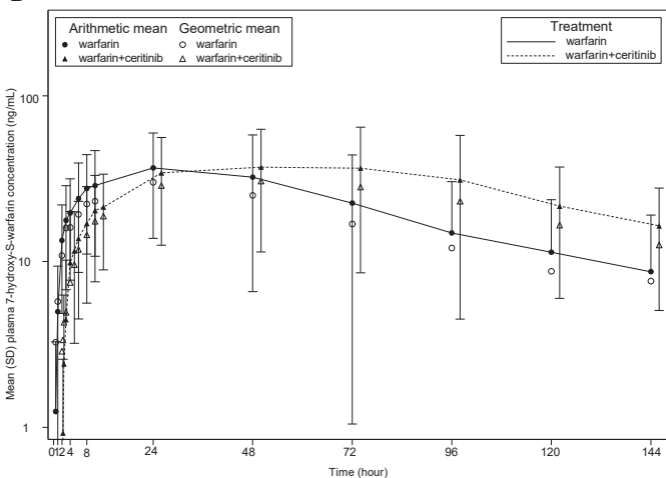**C**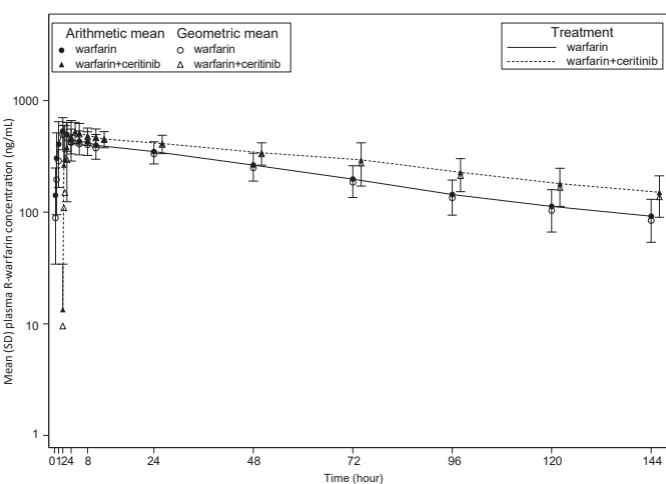

Supplement: 280_2020_4180_MOESM5_ESM.pdf [file 280_2020_4180_MOESM5_ESM.pdf]
