# Supplementary material for: Effect of ceritinib on the pharmacokinetics of coadministered CYP3A and 2C9 substrates: a phase I, multicenter, drug–drug interaction study in patients with ALK + advanced tumors
Source: Springer Nature journal article supplement (doi:10.1007/s00280-020-04180-3), 2021-01-04

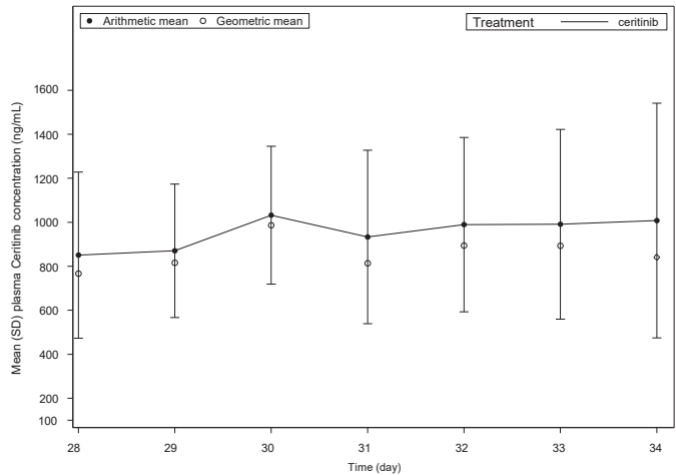

Supplement: MOESM6 [file 18725540]
